# Supplementary material for: Methylphenidate and Short-Term Cardiovascular Risk
Source: PubMed Central journal article supplement (PMC10918505; doi:10.1001/jamanetworkopen.2024.1349), 2024-03-06
Supplement: jamanetwopen-e241349-s001.pdf [file jamanetwopen-e241349-s001.pdf]

## Supplementary Online Content

Garcia-Argibay M, Bürkner PC, Lichtenstein P, et al. Methylphenidate and short-term cardiovascular risk. *JAMA Netw Open*. 2024;7(3):e241349.  
doi:10.1001/jamanetworkopen.2024.1349

**eIntroduction.** Bayesian Statistics

**eMethods.** Detailed Methods

**eResults.** Detailed Results

**eTable 1.** Diagnoses and *ICD-10* Codes to Define the Occurrence of Short-Term Cardiovascular Events

**eTable 2.** Model Fit Comparison Among Negative Binomial, Poisson, Zero-Inflated Poisson, and Zero-Inflated Negative Binomial

**eFigure 1.** Trace Plot of the Four MCMC Chains After Burn-In

**eFigure 2.** Graphical Posterior Predictive Checking Using an Overlay of Density Plots and Distribution of Mean Values in MPH Users and Matched Controls Based on 300 Posterior Draws

**eReferences**

This supplementary material has been provided by the authors to give readers additional information about their work.

## **eIntroduction. Bayesian Statistics**

In contrast to the frequentist paradigm, which focuses on estimating population parameters from observed data, Bayesian statistics adopts a fundamentally different perspective. Rather than treating parameters as fixed but unknown quantities, Bayesians view them as uncertain entities whose credibility should be updated in light of the evidence. This update is formalized through Bayes' theorem, which mathematically combines prior information –available knowledge about the parameter– with the observed data to yield a posterior distribution. This posterior distribution reflects the degree of belief assigned to different possible values of the parameter after accounting for the data. Therefore, a Bayesian analysis revolves around constructing and interpreting the posterior distribution. This distribution encapsulates not just the most likely parameter value (mode) but also the entire range of plausible values and their associated credibility intervals. This probabilistic interpretation resonates intuitively with the clinical domain, where uncertainty and individual variability are inherent features.

The limitations of null hypothesis significance testing (NHST) are well-documented and increasingly acknowledged in medical research. Bayesian inference offers a compelling alternative, addressing these shortcomings and providing valuable advantages in analyzing clinical data. Unlike NHST's binary verdict of “significant” or “not significant,” Bayesian methods quantify the degree of evidence for both the null and alternative hypotheses. This nuanced approach avoids dichotomizing complex effects and facilitates a more informative interpretation of the data. For example, instead of simply concluding “no difference” between methylphenidate and control groups, Bayesian analysis can reveal the extent to which the data support either the absence or presence of an effect. This empowers researchers to move beyond dichotomies and make more confident and precise inferences.

Furthermore, Bayesian methods readily lend themselves to the incorporation of prior information from various sources, such as previous studies, biological plausibility, or expert knowledge. This can be particularly valuable in medical research, where data may be scarce or heterogeneous. By leveraging prior knowledge, Bayesian analyses can yield more precise and informative results than traditional frequentist methods, especially when dealing with rare events or small sample sizes.

## eMethods. Detailed Methods

For the random intercept, a Student's  $t$  prior ( $\mu=0$ ,  $\sigma=2.5$ ,  $\nu=3$ ) was used. Priors for regression slopes were flat (uniform) and the overdispersion parameter ( $\phi$ ) was assigned a weakly-informative gamma (0.01, 0.01) prior. The regression model was fitted with the log link function using 4 independent Markov chain Monte Carlo (MCMC) chains with 1000 warmup iterations and 3500 sampling iterations in each chain. Convergence was assessed by the Gelman-Rubin potential scale reduction factor ( $\hat{R}$ )<sup>1</sup> and using trace plots, and model fit was inspected using graphical posterior predictive checking procedures. Different models (Poisson, zero-inflated Poisson [ZIP], and zero-inflated negative binomial [ZINB]) were fitted and compared via leave-one-out cross validation (LOO-CV)<sup>2</sup> based on the expected log pointwise predictive density (ELPD). Stability was assessed using Pareto- $k$  diagnostics, with values  $<0.7$  deemed appropriate.<sup>2</sup> To ensure an equal rate of cardiovascular events over the baseline period, we fitted a multilevel negative binomial model comparing the 365–183 days before treatment with the 182–1 days before treatment. The overall rate of cardiovascular events was similar between 365–183 days before treatment initiation and 182–1 day before treatment (IRR=1.09, 95% HDI: 0.81–1.45).

### **eResults. Detailed Results**

Model convergence was achieved in all models with a potential scale reduction ( $\hat{R} \approx 1.00$ ); the trace plot suggested that the chains mixed well (eFigure 1), and all parameters had an effective sample size  $>9,000$ . Posterior predictive checking indicated that the predicted counts fitted the observed distribution of the data (eFigure 2). Model fit comparison using LOO-CV showed that the best-fitting model was a negative binomial model (see Supplementary Table S2), and all Pareto  $k$  estimates were less than 0.5.

**eTable 1. Diagnoses and ICD-10 codes to define the occurrence of short-term cardiovascular events.**

|                         | <b>Diagnosis</b>              | <b>ICD-10 code</b>         | <b>Primary</b> | <b>Secondary</b> |
|-------------------------|-------------------------------|----------------------------|----------------|------------------|
| Ischemic heart disease  | Acute myocardial infarction   | I21-I23                    | Yes            | Yes              |
|                         | Acute coronary syndrome       | I21-I23 or I20.0           | Yes            | No               |
| Cerebrovascular disease | Subarachnoid bleeding         | I60                        | Yes            | Yes              |
|                         | Hemorrhagic stroke            | I61-I62                    | Yes            | Yes              |
|                         | Ischemic stroke               | I63-I64                    | Yes            | Yes              |
|                         | Other cerebrovascular disease | I65-I69                    | Yes            | Yes              |
| Venous thrombo-embolism | Deep vein thrombosis          | I80                        | Yes            | Yes              |
|                         | Pulmonary emboli              | I26                        | Yes            | Yes              |
| Heart failure           | Heart failure                 | I50                        | Yes            | Yes              |
| Tachyarrhythmias        | Atrial fibrillation/flutter   | I48                        | Yes            | Yes              |
|                         | Supraventricular tachycardia  | I47.1                      | Yes            | Yes              |
|                         | Ventricular tachycardia       | I47.0, I47.2, I49.0, I49.8 | Yes            | Yes              |
|                         | Cardiac arrest                | I46                        | Yes            | Yes              |

**eTable 2. Model fit comparison among negative binomial, Poisson, Zero-inflated Poisson, and zero-inflated negative binomial.**

| <b>Model</b>          | <b>ELPD (SE)</b> | <b>ΔELPD (SE)</b> |
|-----------------------|------------------|-------------------|
| NB <sup>1</sup> (REF) | -464.1 (17.4)    |                   |
| POI <sup>2</sup>      | -479.6 (20.2)    | -15.5 (5.3)       |
| ZIP <sup>2</sup>      | -472.6 (18.7)    | -8.5 (3.1)        |
| ZIPNB <sup>2</sup>    | -466.6 (17.8)    | -2.5 (1.7)        |

*Note.* Model comparison using leave-one-out cross validation (LOO). ELPD = log pointwise predictive density.

<sup>1</sup>All Pareto  $k$  estimates are good ( $k < 0.5$ ).

<sup>2</sup>All Pareto  $k$  estimates are ok ( $k < 0.7$ ).

eFigure 1. Trace plot of the four MCMC chains after burn-in.

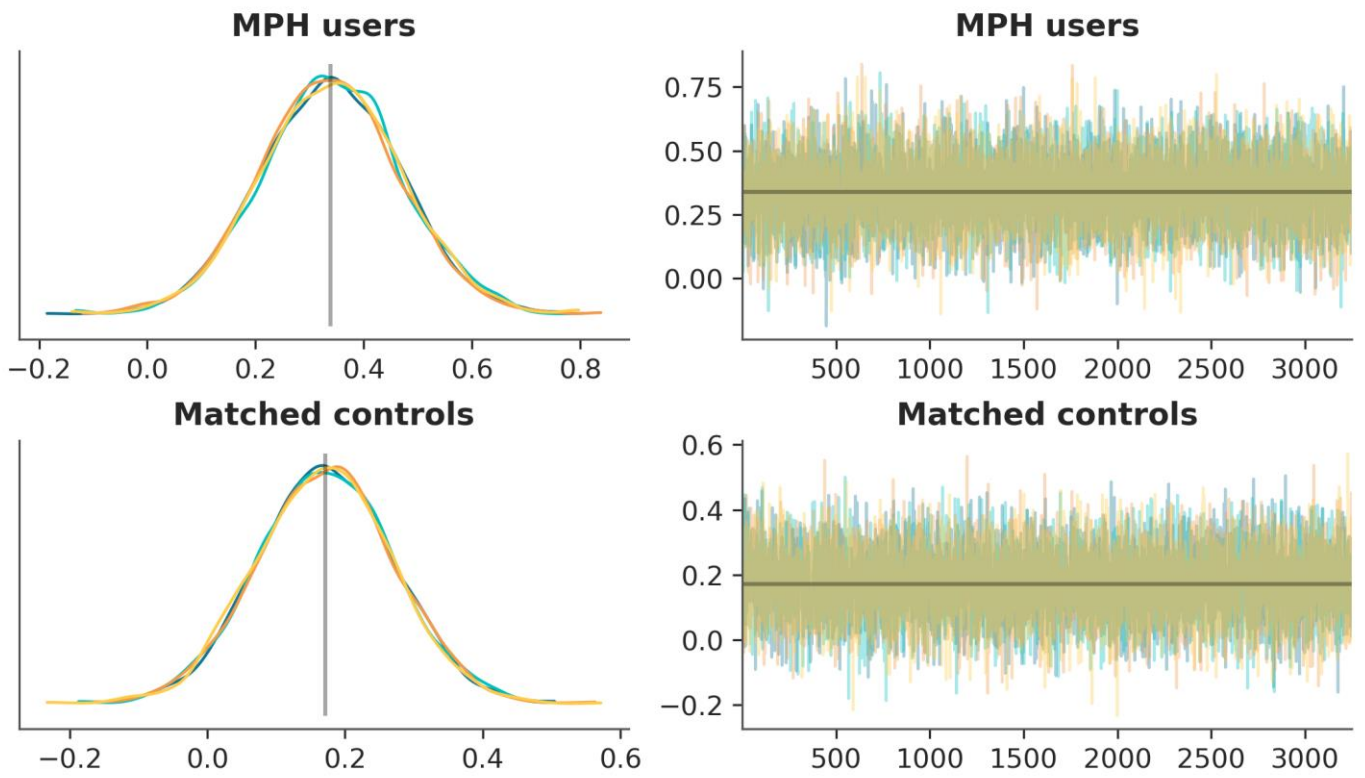

eFigure 2. Graphical posterior predictive checking using an overlay of density plots (left) and distribution of mean values (right) in MPH users and matched controls based on 300 posterior draws.

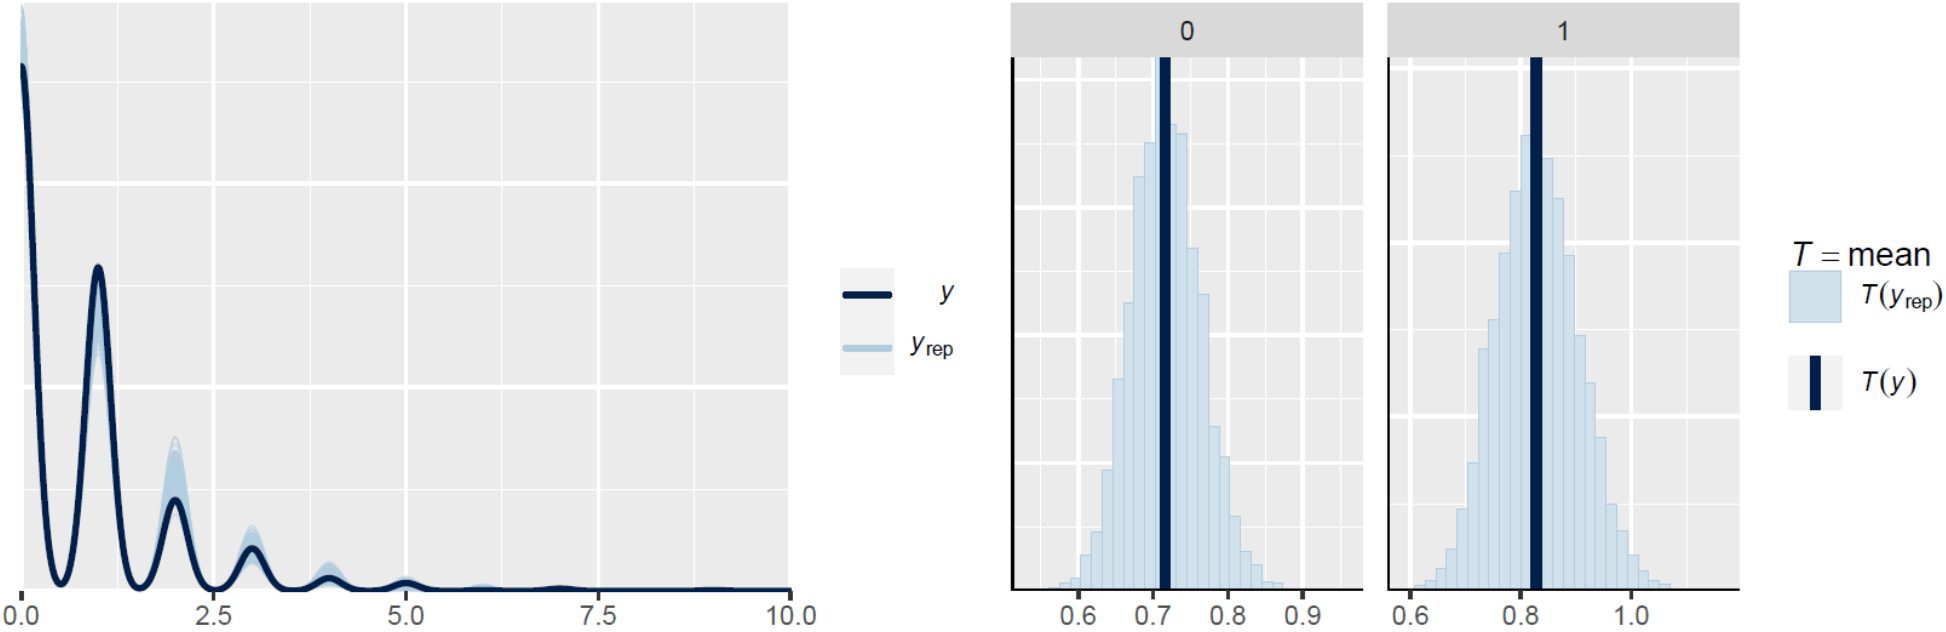

## eReferences

1. Gelman A, Rubin DB. Inference from Iterative Simulation Using Multiple Sequences. *Statist Sci.* 1992;7(4):457-472. doi:10.1214/ss/1177011136
2. Vehtari A, Gelman A, Gabry J. Practical Bayesian model evaluation using leave-one-out cross-validation and WAIC. *Stat Comput.* 2017;27(5):1413-1432. doi:10.1007/s11222-016-9696-4
