# Supplementary material for: Methylphenidate and Short-Term Cardiovascular Risk
Source: PubMed Central journal article supplement (PMC10918505; doi:10.1001/jamanetworkopen.2024.1349), 2024-03-06
Supplement: jamanetwopen-e241349-s002.pdf [file jamanetwopen-e241349-s002.pdf]

## Data Sharing Statement

Garcia-Argibay. Methylphenidate and Short-Term Cardiovascular Risk. *JAMA Netw Open*.  
Published March 06, 2024. doi:10.1001/jamanetworkopen.2024.1349

### Data

**Data available:** No

### Additional Information

**Explanation for why data not available:** The Public Access to Information and Secrecy Act in Sweden prohibits us from making individual level data publicly available. Researchers who are interested in replicating our work can apply for individual level data at Statistics Sweden: [www.scb.se/en/services/guidance-for-researchers-and-universities/](http://www.scb.se/en/services/guidance-for-researchers-and-universities/).
